# Supplementary material for: Evolutionary genomics of the pandemic 2009 H1N1 influenza viruses (pH1N 1v)
Source: PubMed Central journal article supplement (PMC3201028; doi:10.1186/1743-422x-8-250), 2011-05-21

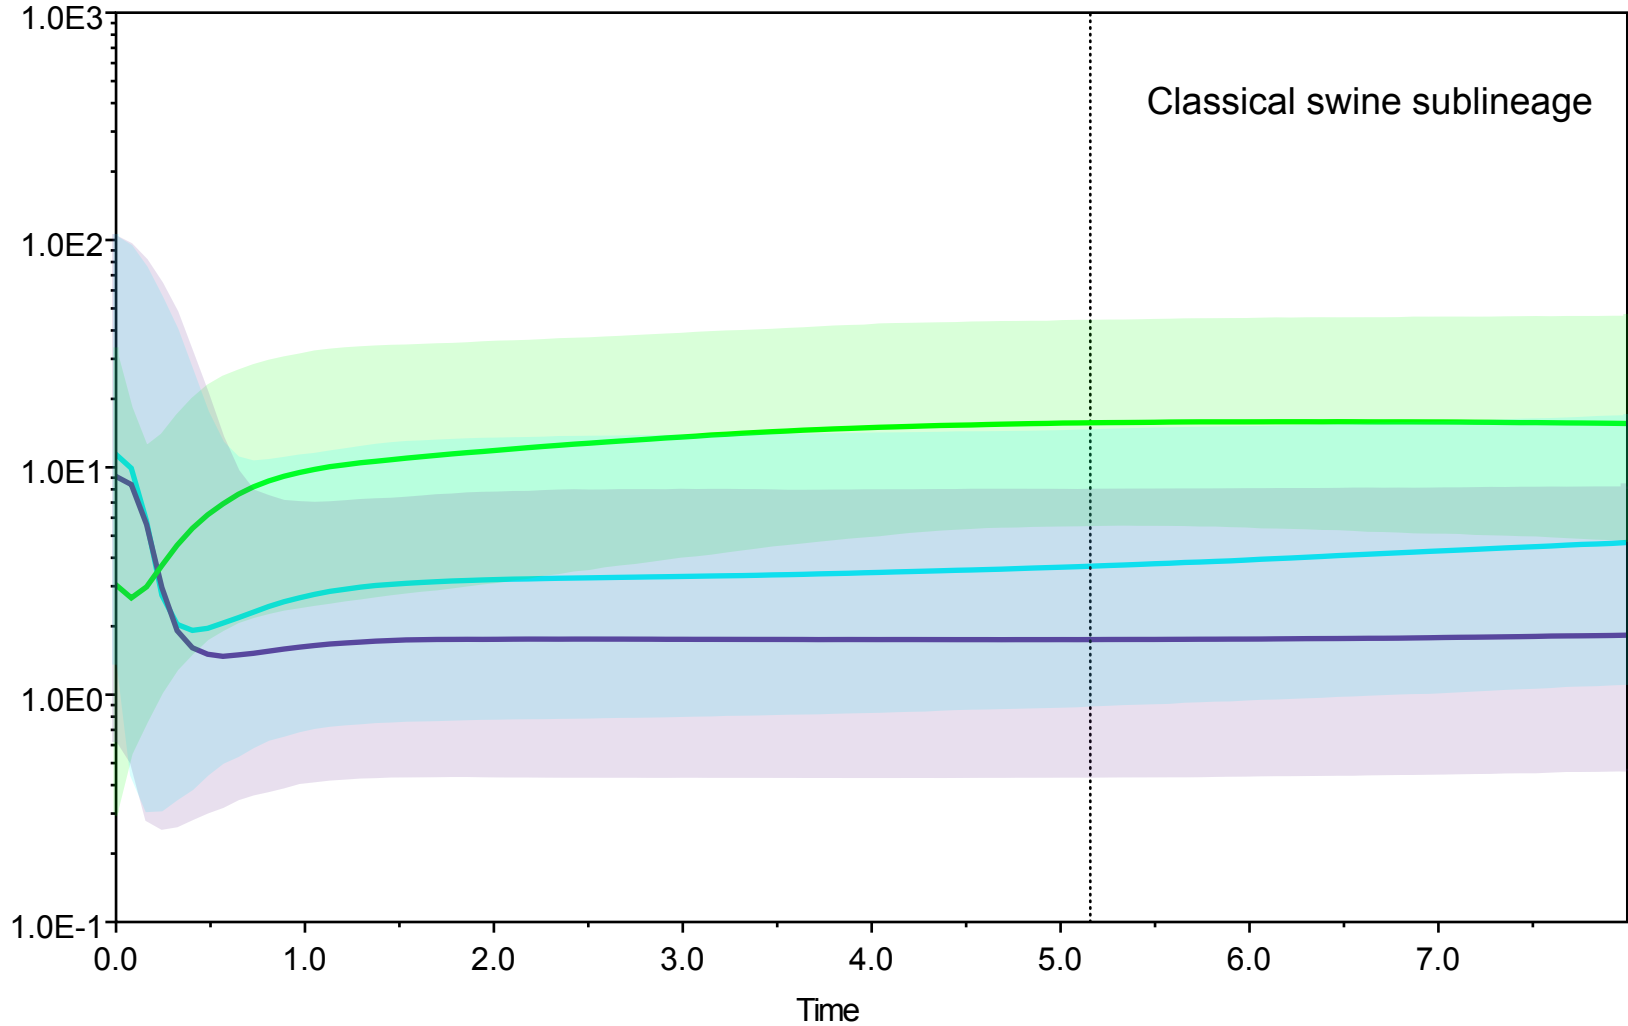

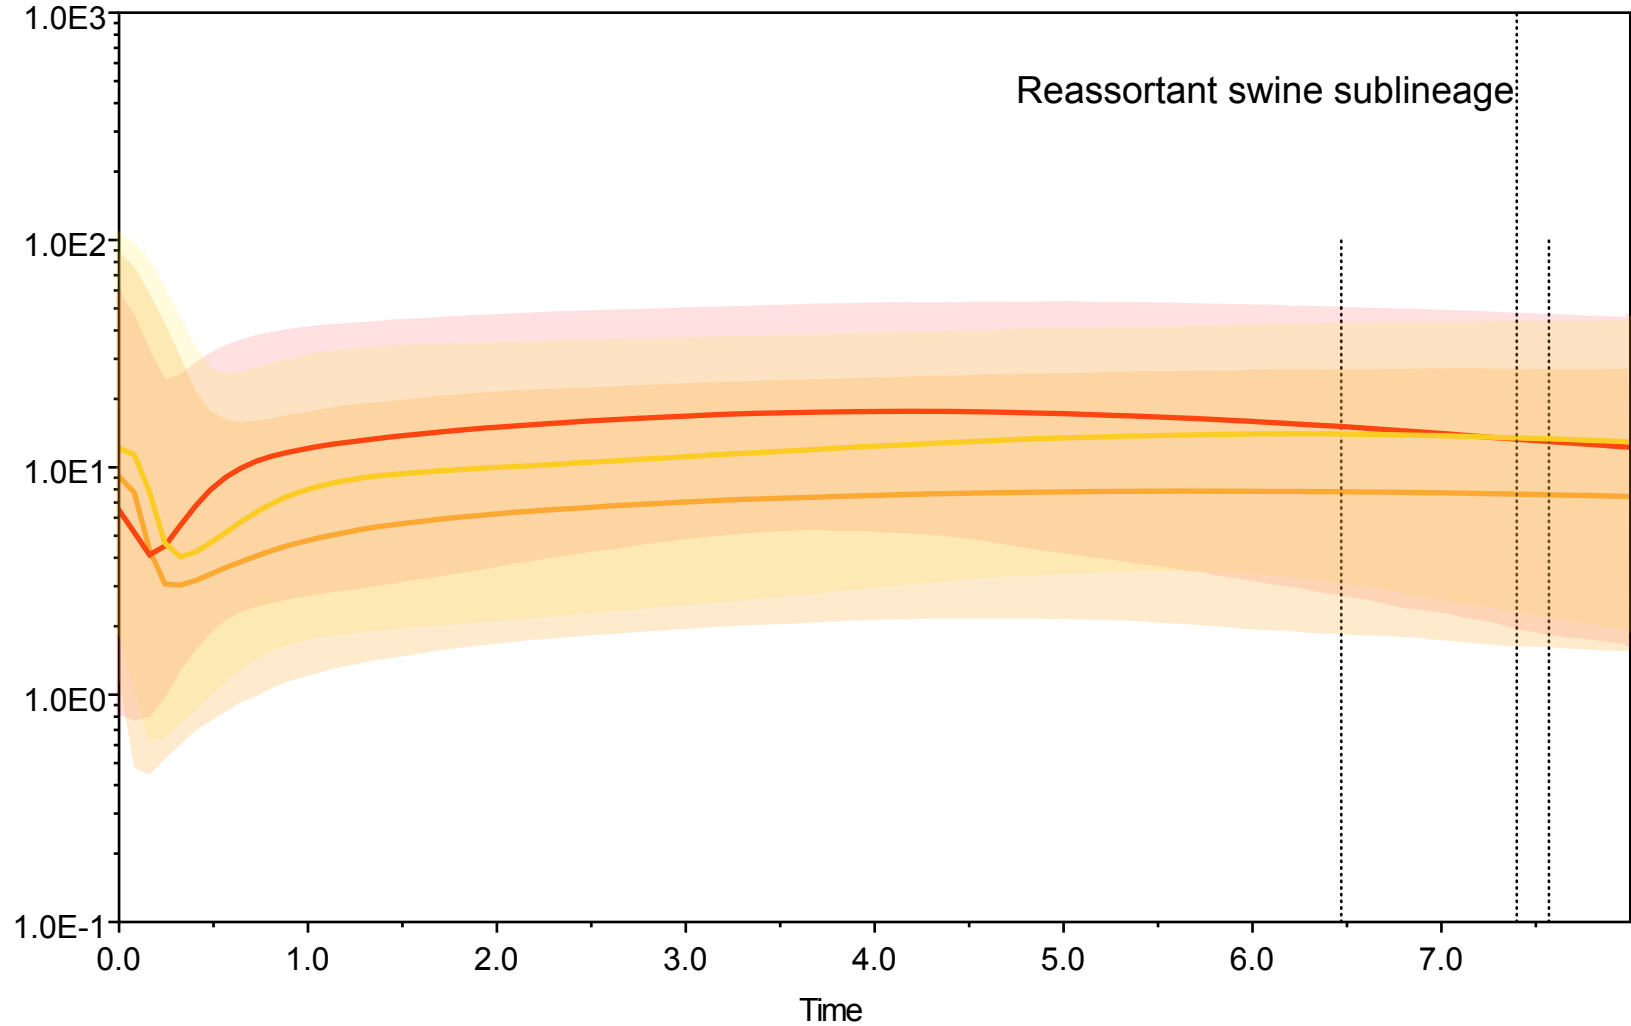

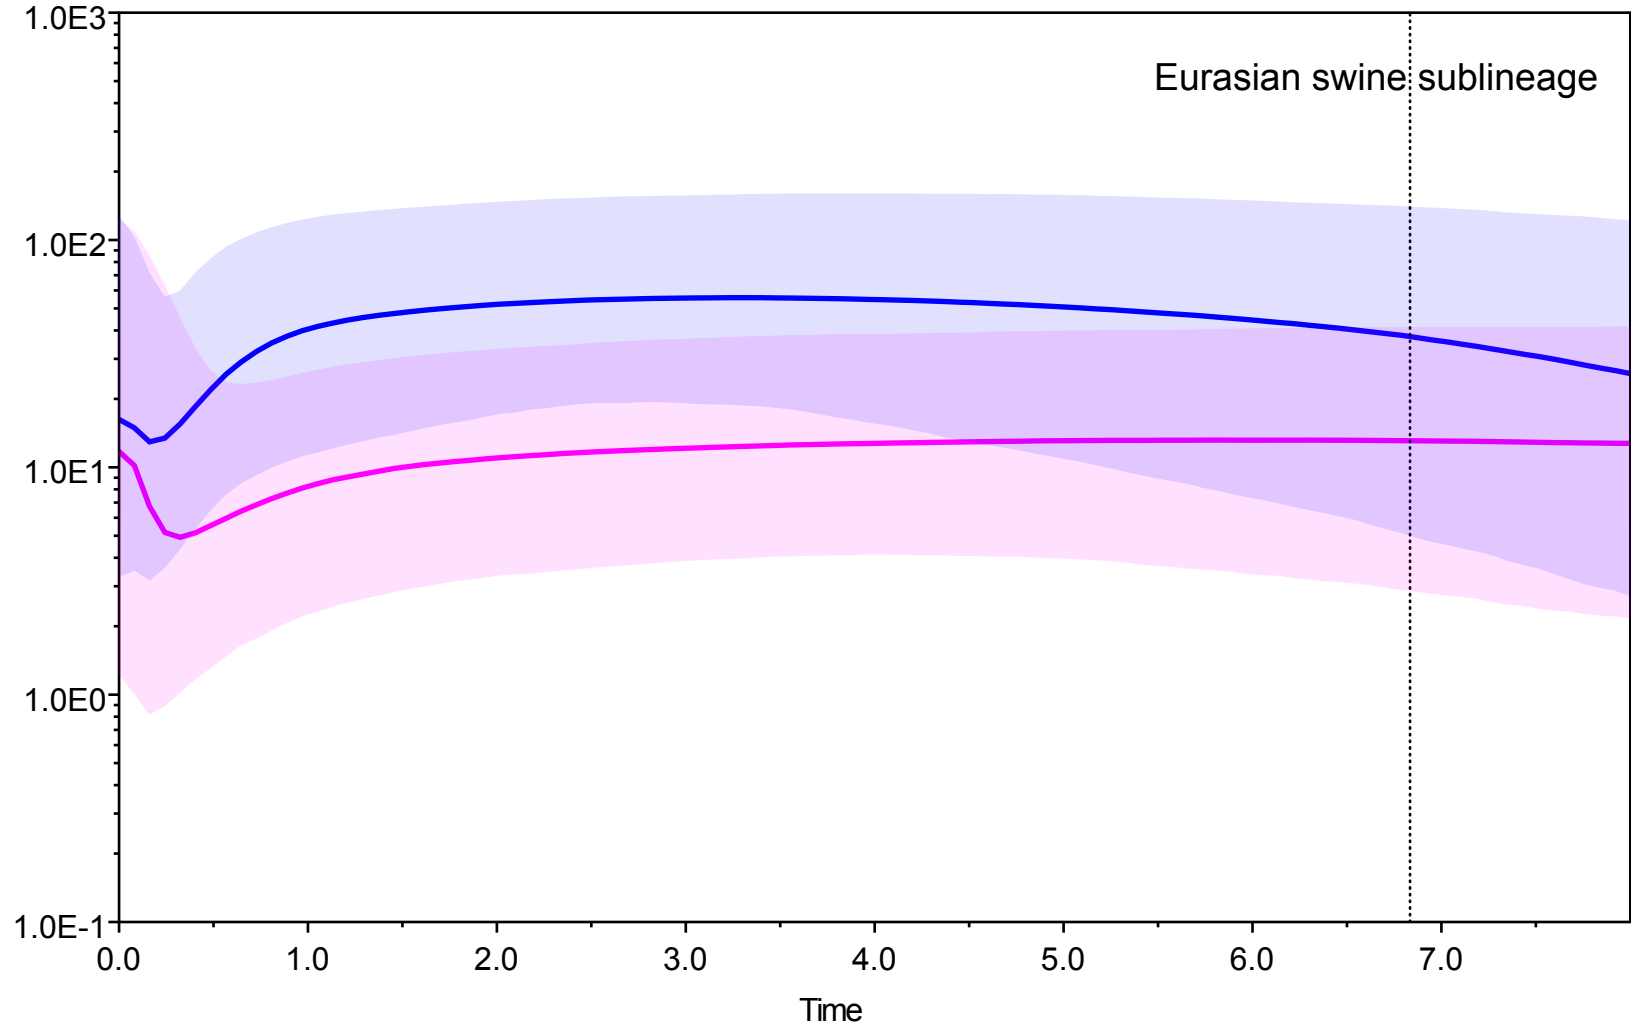

Supplement: 1743-422X-8-250-S5.pdf [file 1743-422X-8-250-S5.pdf]
